# Supplementary material for: Assessing the Risk of Occurrence of Bluetongue in Senegal
Source: PubMed Central journal article supplement (PMC7697801; doi:10.3390/microorganisms8111766), 2020-11-11
Supplement: microorganisms-08-01766-s001.pdf [file microorganisms-08-01766-s001.pdf]

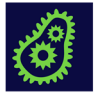

1 Supplementary Information:

2 Geographical location of sampling sites of the entomological and serological survey

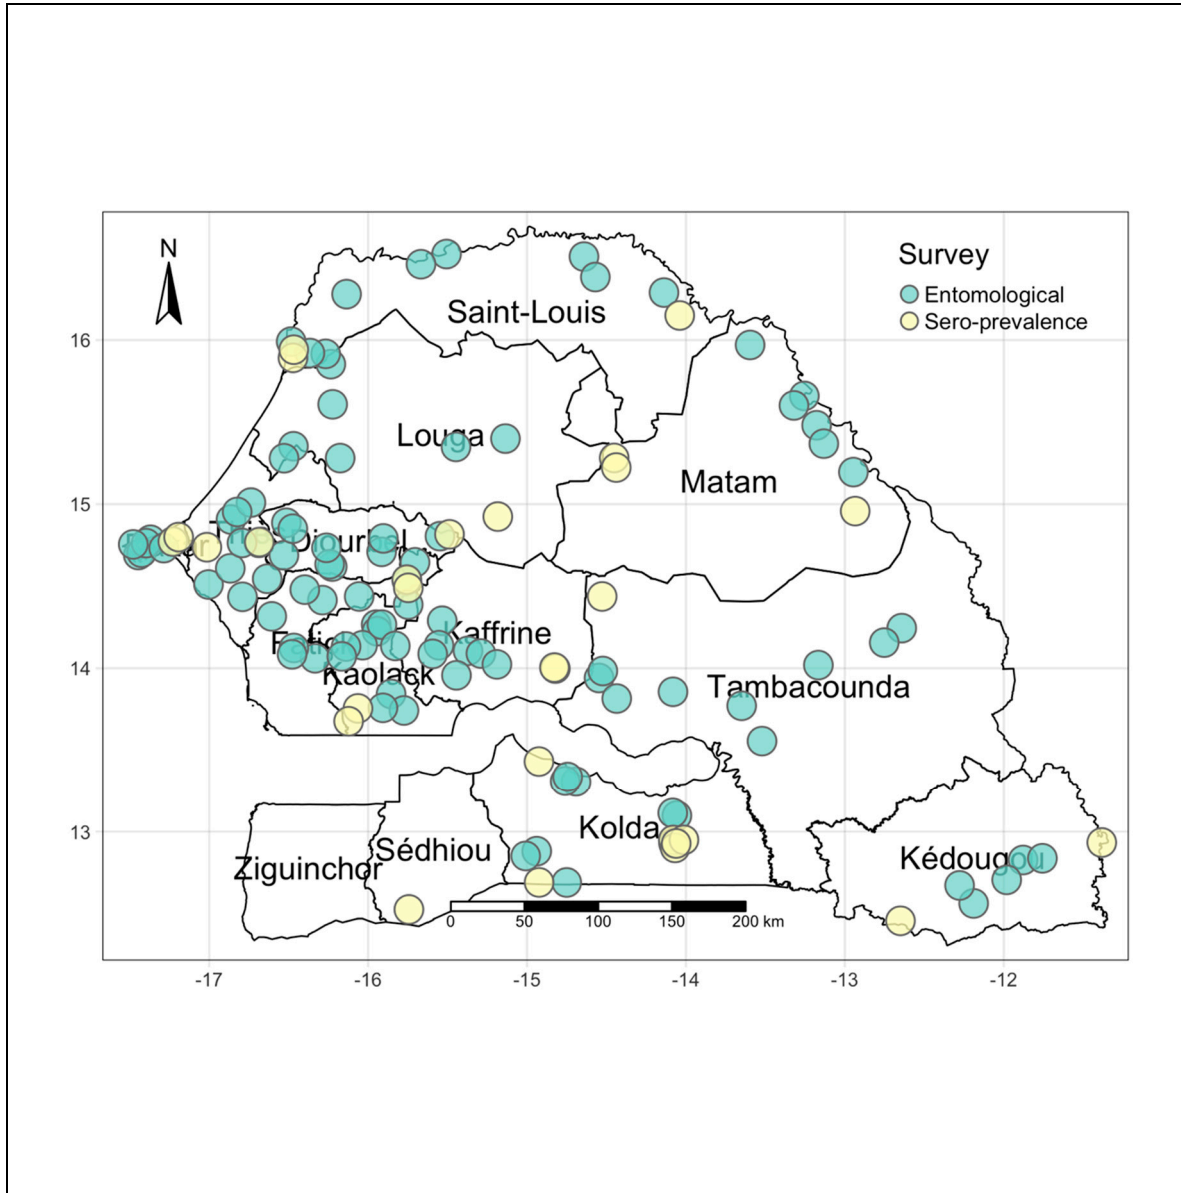

3 **Figure S1** Sampling sites: (blue circles) Entomological capture points; and (yellow circles) for serological survey.

4

5 Results of the serological and entomological survey are shown in table where we reported the  
6 average sero-prevalence by Region, the number of veterinarian Interest Culicoides collected  
7 specimens and their distribution

8 Table S1. Results from the Serological and Entomological Survey by Region. The second column contains the  
 9 average BT sero-prevalence in the Region, the third the number of specimens for Culicoides of Veterinarian  
 10 interest, the other ones show the distribution of the 4 species .

| Region      | Serological Survey |                 | Entomological Survey |                |                  |              |
|-------------|--------------------|-----------------|----------------------|----------------|------------------|--------------|
|             | Prevalence (%)     | Total Specimens | C.imicola (%)        | C.oxystoma (%) | C.enderleini (%) | C.miombo (%) |
| Dakar       | 41,9               | 65394           | 1,7                  | 97,9           | 0,3              | 0,1          |
| Diourbel    | 82,5               | 33319           | 40,3                 | 10,5           | 10,0             | 39,2         |
| Fatick      | 97,2               | 176236          | 9,8                  | 52,4           | 34,5             | 3,3          |
| Kaffrine    | 55                 | 28015           | 9,4                  | 6,9            | 19,8             | 63,9         |
| Kaolack     | 50                 | 71008           | 30,9                 | 26,2           | 30,7             | 12,3         |
| Kédougou    | 81,2               | 60402           | 57,1                 | 4,1            | 34,5             | 4,2          |
| Kolda       | 62,4               | 180473          | 12,7                 | 9,6            | 51,2             | 26,5         |
| Louga       | 95                 | 1201            | 41,9                 | 16,8           | 24,4             | 16,9         |
| Matam       | 81,6               | 3361            | 34,4                 | 30,3           | 35,4             | 0,0          |
| Saint-Louis | 86,6               | 13224           | 6,7                  | 9,4            | 83,7             | 0,3          |
| Sédhiou     | 39,4               |                 |                      |                |                  |              |
| Tambacounda | 72,2               | 33005           | 17,3                 | 10,9           | 19,7             | 52,1         |
| Thiès       | 41                 | 31003           | 27,7                 | 8,2            | 31,8             | 32,4         |

11

12

13

14 The epidemiological model that describes the dynamics of Bluetongue virus infection in small  
 15 ruminants and vectors is described by the following set of related differential equations:

$$\left. \begin{aligned}
 & \frac{dImm_h}{dt} = b_h R_h - (\eta_h + d_h) Imm_h \\
 & \frac{dS_h}{dt} = \eta_h Imm_h + b_h (N_h - R_h) - (\lambda_h + d_h) S_h \\
 & \frac{dE_h}{dt} = \lambda_h S_h - (\alpha_h + d_h) E_h \\
 & \frac{dI_h}{dt} = \alpha_h E_h - (r_h + d_h) I_h \\
 & \frac{dR_h}{dt} = (1 - p) r_h I_h - (d_h) R_h \\
 & \frac{dD_h}{dt} = (p) r_h I_h \\
 & \frac{dS_v}{dt} = b_v N_v - (\lambda_v + d_v) S_v \\
 & \frac{dE_v}{dt} = \lambda_v S_v - (\alpha_v + d_v) E_v \\
 & \frac{dI_v}{dt} = \alpha_v E_v - (d_v) I_v
 \end{aligned} \right\}$$

17

18 **Table S1 List of the environmental, climatic, and animal density variables used for the analysis and**  
 19 **their abbreviations**

| Category of variables | Description                                                   | Abbreviation |
|-----------------------|---------------------------------------------------------------|--------------|
| <b>Temperature</b>    | Annual Mean Temperature                                       | Bio01        |
|                       | Mean Diurnal Range (Mean of monthly (max temp – min temp))    | Bio02        |
|                       | Isothermality (Bio02/Bio07)*100                               | Bio03        |
|                       | Temperature seasonality (standard deviation *100)             | Bio04        |
|                       | Maximum Temperature of Warmest Month                          | Bio05        |
|                       | Minimum Temperature of Coldest Month                          | Bio06        |
|                       | Temperature Annual Range (Bio05-Bio06)                        | Bio07        |
|                       | Mean Temperature of Wettest Quarter                           | Bio08        |
|                       | Mean Temperature of Driest Quarter                            | Bio09        |
|                       | Mean Temperature of Warmest Quarter                           | Bio10        |
|                       | Mean Temperature of Coldest Quarter                           | Bio11        |
| <b>Precipitation</b>  | Annual Precipitation                                          | Bio12        |
|                       | Precipitation in the wettest month                            | Bio13        |
|                       | Precipitation in the driest month                             | Bio14        |
|                       | Precipitation seasonality (coefficient of variation)          | Bio15        |
|                       | Precipitation in the wettest quarter                          | Bio16        |
|                       | Precipitation in the driest quarter                           | Bio17        |
|                       | Precipitation in the warmest quarter                          | Bio18        |
|                       | Precipitation in the coldest quarter                          | Bio19        |
| <b>Altitude</b>       | Digital elevation model                                       | dem          |
| <b>Animal density</b> | Cumulated density of horses, cattle, donkeys, goats and sheep | Livestock    |
|                       | Cattle density                                                | Cattle       |
|                       | Goat density                                                  | Goat         |

|                |        |
|----------------|--------|
| Sheep density  | Sheep  |
| Horse density  | Horse  |
| Donkey density | Donkey |

20

21

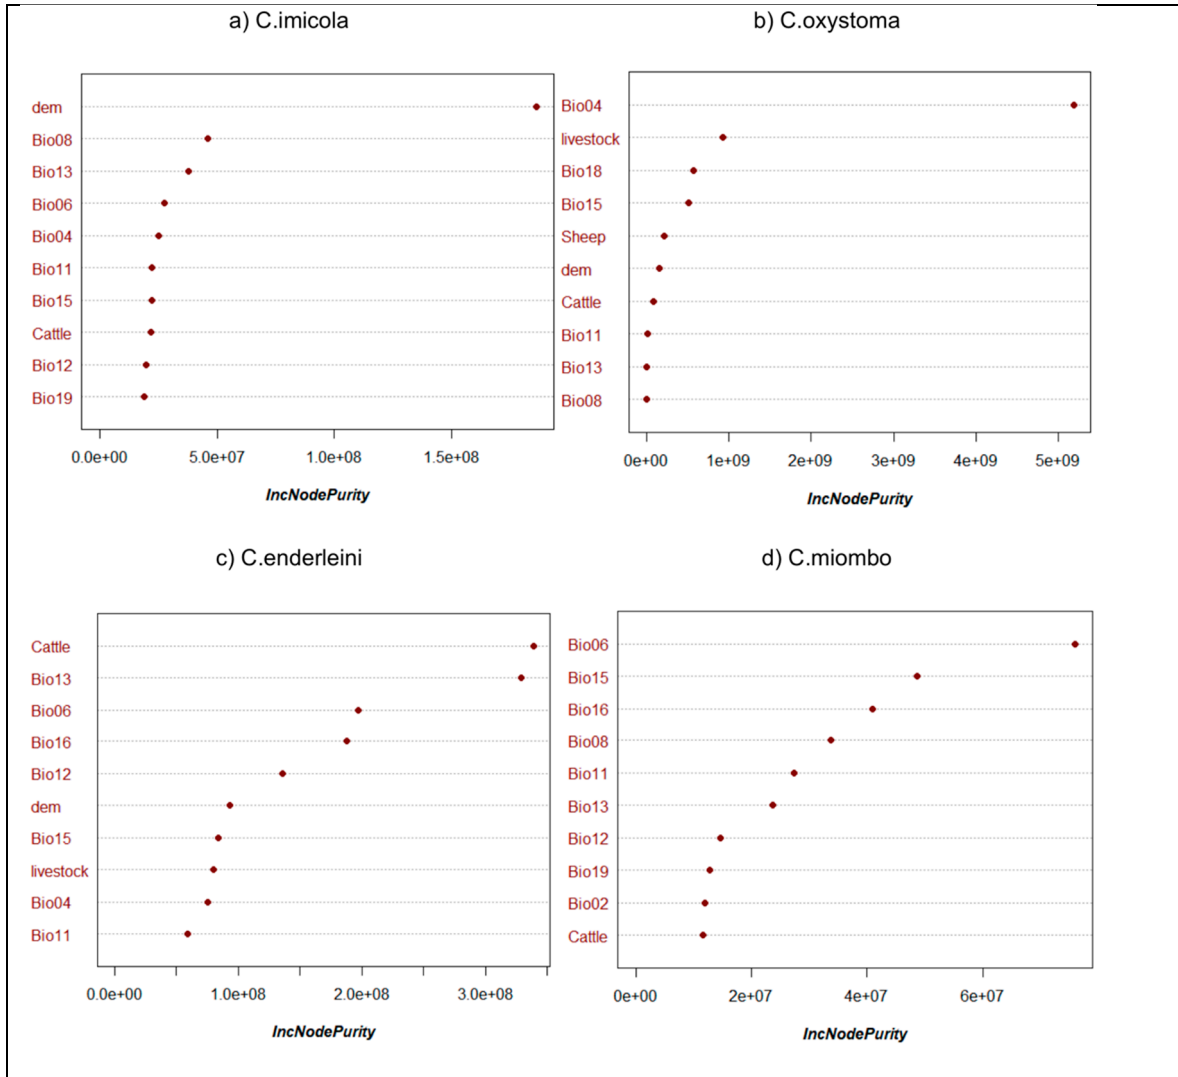

22

23

24

25

**Figure S2** Importance of variables in the abundance of 4 main BTV vector species in Senegal: (a) *C. imicola*; (b) *C. oxystoma*; (c) *C. enderleini* and (d) *C. miombo*

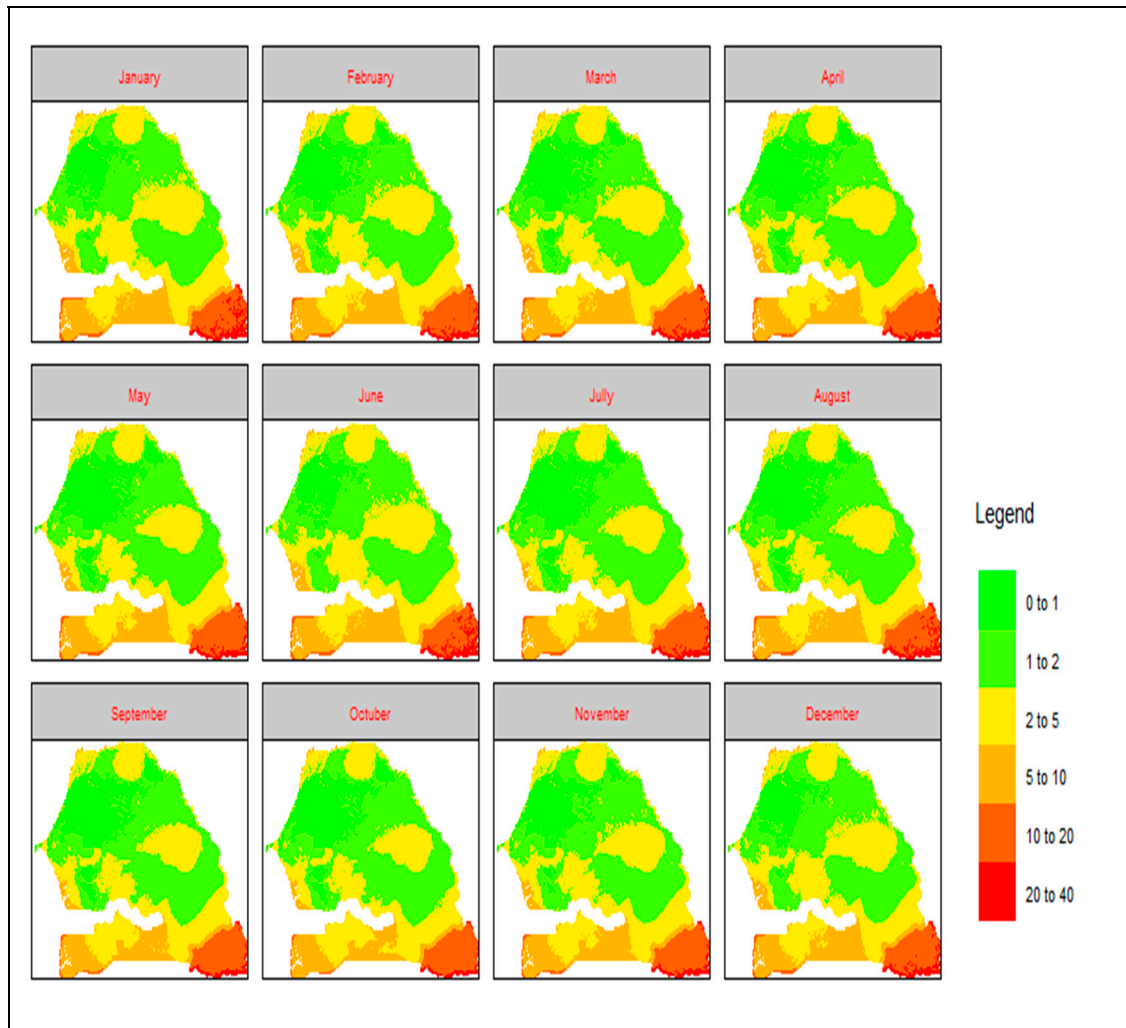

26 **Figure S3** Monthly transmission map. Host mortality and fertility rates vary each month

27 Analysis of Figure S3 shows that, regardless of the month considered, Casamance (Ziguinchor,  
 28 Sedhiou and Kolda) and Kédougou region have a high probability of the occurrence of a major  
 29 epizootic disease as the value of  $R_0$  is high in all these areas, regard less of the month of the year. We  
 30 also note that the trends in the risk map based on the average monthly daily birth and death rates of  
 31 small ruminants differ slightly. Indeed, all the other parameters remain the same from one month to  
 32 another, and the differences between the risk maps reflect the differences in the average daily and  
 33 monthly birth and death rates of small ruminants for the different months.

34

35
